# Supplementary material
Source: PubMed Central journal article supplement (PMC7508615)
Supplement: AAC.00721-20-s0001.pdf [file AAC.00721-20-s0001.pdf]

**Table S1. Prevalence of wild type, mixed, and mutant genotypes in the three study groups.**

| Locus                | Genotype  | Asymptomatic controls<br>N=179 | Uncomplicated malaria controls<br>N=275 | Severe malaria Cases<br>N=274 |
|----------------------|-----------|--------------------------------|-----------------------------------------|-------------------------------|
| <b>PfMDR1 N86Y</b>   |           | <b>N=148</b>                   | <b>N=274</b>                            | <b>N=266</b>                  |
|                      | Wild type | 121 (81.7%)                    | 255 (93.0%)                             | 254 (95.4%)                   |
|                      | Mixed     | 19 (12.8%)                     | 16 (5.8%)                               | 9 (3.3%)                      |
|                      | Mutant    | 8 (5.4%)                       | 3 (1.0%)                                | 3(1.1%)                       |
| <b>PfMDR1 Y184F</b>  |           | <b>N=173</b>                   | <b>N=274</b>                            | <b>N=271</b>                  |
|                      | Wild type | 42 (24.2%)                     | 68 (24.8%)                              | 95 (35.0%)                    |
|                      | Mixed     | 115 (66.4%)                    | 143 (52.1%)                             | 103 (38.0%)                   |
|                      | Mutant    | 16 (9.2%)                      | 63 (22.9%)                              | 73(26.9%)                     |
| <b>PfMDR1 D1246Y</b> |           | <b>N=134</b>                   | <b>N=268</b>                            | <b>N=255</b>                  |
|                      | Wild type | 122 (91.0%)                    | 227 (84.7%)                             | 212 (83.1%)                   |
|                      | Mixed     | 4 (2.9%)                       | 18 (6.7%)                               | 19 (7.4%)                     |
|                      | Mutant    | 8 (5.9%)                       | 23 (8.5%)                               | 24 (9.4%)                     |
| <b>PfCRT K76T</b>    |           | <b>N=114</b>                   | <b>N=261</b>                            | <b>N=266</b>                  |
|                      | Wild type | 24 (21.0%)                     | 101 (38.7%)                             | 85 (31.98%)                   |
|                      | Mixed     | 20 (17.5%)                     | 43 (16.4%)                              | 40 (15.0%)                    |
|                      | Mutant    | 70 (61.4%)                     | 117 (44.8%)                             | 141 (53.0%)                   |
